## Title page

# Knowledge, attitudes, and practices associated with Vitamin D supplementation: A cross-sectional online community survey of adults in the UK

## Short title: Vitamin D knowledge, attitudes, and practices

| Name                 | Degrees                                      | Job title                                                                  | Institution                                                        | ORCID                          | Email                                                                    |
|----------------------|----------------------------------------------|----------------------------------------------------------------------------|--------------------------------------------------------------------|--------------------------------|--------------------------------------------------------------------------|
| Nuttan Tanna*<br>1,3 | MRPharmS<br>PhD<br>FRPS                      | Consultant Pharmacist, Women's Health, Honorary Senior Research Fellow     | London NW University Healthcare NHS Trust, Imperial College London | 0000-0003-1637-283X            | <a href="mailto:nuttantanna@nhs.net">nuttantanna@nhs.net</a>             |
| Manisha Karki<br>2   | BSN<br>MPH                                   | Research Assistant                                                         | Imperial College London                                            | 0000-0001-6996-8915            | <a href="mailto:m.karki@imperial.ac.uk">m.karki@imperial.ac.uk</a>       |
| Iman Webber<br>2     | BSc                                          | Research Assistant                                                         | Imperial College London                                            | 0000-0002-1690-0121            | <a href="mailto:i.webber@imperial.ac.uk">i.webber@imperial.ac.uk</a>     |
| Aos Alaa<br>2        | MSc                                          | Research Assistant                                                         | Imperial College London                                            | 0000-0001-6130-5092            | <a href="mailto:aos.alaa18@imperial.ac.uk">aos.alaa18@imperial.ac.uk</a> |
| Austen El-Osta<br>2  | MSc<br>MPA<br>PhD                            | Director Imperial SCARU                                                    | Imperial College London                                            | <del>0000-0002-8772-4938</del> | <a href="mailto:a.el-osta@imperial.ac.uk">a.el-osta@imperial.ac.uk</a>   |
| Mitch Blair<br>1, 3  | MBBS<br>MSc<br>FRCPC<br>FFPH<br>FHEA<br>FIHV | Professor Paediatrics and Child Public Health and Consultant Paediatrician | London NW University Healthcare NHS Trust, Imperial College London | <del>0000-0001-7442-0188</del> | <a href="mailto:m.blair@imperial.ac.uk">m.blair@imperial.ac.uk</a>       |

1. River Island Paediatric and Child Health Academic Unit, Northwick Park Hospital site, London North-West University Healthcare NHS Trust.
2. Self-Care Academic Research Unit (SCARU), School of Public Health, Imperial College London,
3. Department of Primary Care & Public Health, Imperial College London

\*Corresponding author

NOTE: This preprint reports new research that has not been certified by peer review and should not be used to guide clinical practice.

# Abstract

**Objective:** Assess knowledge, attitudes, and practices (KAPs) of a diverse population. Identify barriers and facilitators that inform routine vitamin D supplementation and self-care in the community setting.

**Design:** Cross-sectional online voluntary survey. Electronic survey link published on college Qualtrics platform and advertised widely. Study information provided with Participant Information Sheet.

**Setting and Participants:** 556 community dwelling adults across the UK.

**Methods:** The overarching study included two phases, incorporating quantitative and qualitative methodologies. This paper reports findings from the first phase of the FABCOM-D (Facilitators and Barriers to Community (Healthy) Vitamin D status) study. Online survey questions were iteratively developed after background literature searches and piloted to ensure clarity and ease of understanding. Survey responses summarised using frequencies and percentages, and univariable and multivariable logistic regression models explored for any association. A p-value less than 0.05 was considered statistically significant. The Checklist for Reporting Results of Internet E-Surveys guided reporting. Statistical analysis performed using IBM SPSS software.

**Main outcome measures:** Awareness of vitamin D information sources, health benefits and testing. Attitudes to supplementation, sun exposure and fortification.

**Results:** Three quarters of the community had some awareness of vitamin D and around half were taking supplements. The two most trusted sources of information included health professionals and the NHS website. Participants were willing to pay for supplements, supporting a self-care agenda. With increasing age, there was significant reduced intake of vitamin D supplements. This aspect needs to be explored further as this could be a concern in deficiency status in the elderly. There was acceptance of food fortification but uncertainty on how to balance food intake with supplementation

**Conclusion:** We were successful in eliciting views on KAPs around vitamin D from a community population including a large proportion of Black and Minority Ethnic individuals. The community wanted information and guidance to help manage individual vitamin D status, especially for high-risk groups, and on balancing supplementation, food fortification and sun exposure.

**Key words:** Vitamin D, Supplementation, Self-Care, Black and Minority Ethnic, Survey, Fortification, Sun exposure.

# Introduction

Vitamin D, a fat-soluble steroid hormone precursor, is responsible for regulating calcium and phosphorous metabolism in humans (1) and essential for musculoskeletal health. Vitamin D deficiency (VDD), defined as a serum level of 25-hydroxy-vitamin D (25(OH)D) of less than 25 nmol/l, is a global health problem with over 1 billion people affected worldwide (2). Over the last decade, there has been considerable interest in vitamin D and the use of vitamin D supplements to help prevent or treat a variety of medical presentations (3). Claims in the media abound, and sales of vitamin D supplements have increased 10-fold since 2001 (3). The risk of VDD is higher in pregnant women, children under five years of age, and in people without much sun exposure including frail and institutionalised individuals and ethnic groups with darker skin pigmentation (e.g. Asian and African populations) (4-6). Adequate vitamin D status during pregnancy is important for foetal musculoskeletal development and general foetal growth (7), with a Cochrane review noting that the consequences of deficient levels during pregnancy could include lower neonate birth weight, head circumference and length (8). Adequate vitamin D levels have been associated with lower risks of pre-eclampsia and gestational diabetes (8). VDD also causes nutritional rickets; a bone disease seen in young children which can also be due to poor dietary calcium intake (9) and still prevalent in the UK despite public health campaigns. Chronically deficient levels in preschool children have also been associated with hypocalcaemic seizures, and cardiomyopathy, as well as motor delay, aches, pains and fractures (5,10). Vitamin D may also affect immune and cardiovascular system modulation (6); however, studies have not yet demonstrated a clear causative effect (11-13). Long-term health outcomes of VDD may include development of obesity, diabetes, asthma, hypertension, depression, osteoporosis with osteomalacia as an

underlying condition increasing the risk of fragile bones (14,15), neurodegenerative diseases and some cancers (8).

The main source of vitamin D in humans is solar radiation, scattered and filtered through Earth's atmosphere and obvious as daylight when the sun is above the horizon. Upon exposure to sunlight containing sufficient ultraviolet B (UVB) radiation, vitamin D is synthesised in the skin (11,16). Vitamin D can also be obtained from foods or dietary supplements. Dietary sources are essential when sunlight containing UVB radiation is limited, as is the case during the winter months in northern latitudes or where skin exposure is restricted (17). Vitamin D initially goes through hepatic metabolism to form 25(OH)D. It is subsequently metabolised in the kidneys to calcitriol, a physiological active form of vitamin D. As calcitriol has a very short half-life in the plasma, levels of its precursor, 25(OH)D, are measured to assess vitamin D status (18,19). In the UK, a daily supplement of 10µg/day (400 IU/d) is recommended for those aged four years and above (20). People with higher body mass index (BMI) and larger waist circumferences have lower serum levels (21), and higher doses of vitamin D supplements may be needed.

Previous research, including questionnaire studies (14,22,23), has been conducted to assess the knowledge, attitudes, and practices (KAPs) in relation to Vitamin D. In a Scottish study conducted to assess the KAPs of vitamin D, around 90% of the study population was Caucasian, and many other groups traditionally considered to be at risk of vitamin D deficiency were not well represented (23). There is a pressing need to study the knowledge, attitudes, and practices of the wider community, in particular from Black, Asian and minority ethnic subpopulations, to gain an understanding of the

facilitators of and barriers to vitamin D supplementation in men, women and children. Lee C et al explored these aspects in depth with a Somali community in Northwest London and found that a lack of awareness, access, and a reluctance to medicalise a natural state (pregnancy) were key issues (10,24). The work undertaken included a systematic review that reported a paucity of studies that address the behavioural determinants that would help attain an adequate vitamin D status in hard-to-reach communities (10).

This paper reports findings from the online survey, the first phase of the FABCOM-D (Facilitators and Barriers to Community (Healthy) Vitamin D status) study. It was undertaken to assess the KAPs of the diverse community in the UK, including both Caucasian and minority ethnic groups and offers important insights on the current usage of vitamin D and associated issues.

### **Study Objectives**

The aim of the FABCOM-D study is to investigate the barriers and drivers for the routine supplementation of vitamin D in the community setting, focusing on where and how people receive their health information on vitamin D and the benefits of supplementation. The study design includes two phases, a cross-sectional online survey with findings reported in this paper and to be followed by further in-depth study of the topic within focus group and interview settings.

## **Methods**

## Study Design

A cross-sectional online survey, incorporating iteratively designed questions, was implemented to assess attitudes and experiences regarding Vitamin D and supplementation within the respondent community. The electronic survey (e-survey) link was published and available on the Imperial College Qualtrics platform between 10 February and 02 September 2021 (7 months). The survey was disseminated by email using convenience sampling through existing personal and professional networks, including ARC (Applied Research Collaboration) Northwest London, the CHAIN Network (Contact, Help, Advice, and Information Network) and social media platforms. It was open to all and could be accessed by anyone with a link to the web portal. Study information was provided and included a Participant Information Sheet (PIS). The PIS included information on study aims, protection of participants' personal data, including their right to withdraw from the study at any time, which data were stored, where and for how long, who the investigators were, and survey length. Participants were informed that this was a voluntary survey without any monetary incentives but that the aim was to publish study results. Participants were also asked if they would be interested in being part of a focus group or one to one interview in the study's second phase, with the opportunity to discuss these issues more fully. The potential collective benefits of taking part in terms of helping advance knowledge in this area was highlighted. The data collected was stored on the Imperial College London secure database, and only the research team could access the e-survey results.

## **Electronic survey**

The e-survey contained 36 questions and automatically captured responses. The questions were agreed with consensus by the research group via iterative development and review process rounds. The research group also included medical students who had opted to work with the RI-PAC unit's life course Vitamin D project team, for experiential formative learning, on their research speciality choice module at Imperial College, London (25). Before answering the e-survey questionnaire, participants were asked to confirm their consent. The questions were displayed on pages accessible using either a personal computer or smartphone. Questions on respondent demographic characteristics included gender, age, ethnicity, and occupation/field of work, the first part of postal code, dietary restrictions, skin type (26) and medical conditions. Participants could review their answers again before submitting them. The survey did not contain any conditional questions. Survey responses were only excluded if much of the survey was incomplete. All data collected through the survey were anonymised and not personally identifiable. The online survey was piloted with a small group of individuals to ensure technical functionality and usability before being published. The e-survey questions were informed by previous background literature searches and included asking about the participant's own experience with Vitamin D, potential health benefits, and who the respondents' thought were in at-risk categories. The survey also covered preferences for supplementation, food fortification, testing and attitudes to pricing - See Appendix 1 for full copy of survey questionnaire. Data were collected with the e-survey questionnaire administered on Qualtrics, using web-based software. Qualtrics's websites have first party cookies and allow third parties to place cookies on devices. As no IP addresses were collected, the team could not identify any cases of duplicate entries.



## **Statistical analysis**

Survey responses were summarised using frequencies and percentages. Univariable and multivariable logistic regression models explored the association. A p-value less than 0.05 (<0.05) was considered statistically significant. The Checklist for Reporting Results of Internet E-Surveys (CHERRIES) was used to guide reporting (27). The statistical analysis was performed using IBM Corp. Released 2020. IBM SPSS Statistics for Windows, Version 27.0. Armonk, NY: IBM Corp.

# **Results**

## **Demographic profile of respondents**

The e-survey captured responses from some 557 respondents from across the United Kingdom: with 71 excluded due to missing data for age, sex, and ethnicity. Table 1 presents the demographic data with frequency and percentage figures for the total of 486 respondents included for analysis.

The majority of respondents were women (356; 73%), with just over a quarter male respondents. Most (136;28%) were aged between 51-60, with 115 (24%) indicating that they were between 61-70 and 89 (18%) between 31-40 years of age. Nearly half (240;49%) of respondents were from a White ethnic background, with 221 (45%) combined from an Asian (29%) and British Black/African/Caribbean (16%) background (see Table 1). Over three-quarters (372;76%) of respondents said they had a university degree or higher, and more than half (257;53%) had a full-time job. 78 (16%) had retired.

**Table 1: Association between Vit-D intake (Q.9) and age, gender, ethnicity, BMI, skin type, sun exposure and skin coverage.**

|                                                                                                                          | Vit-D supplement intake |              |                | p-value         |
|--------------------------------------------------------------------------------------------------------------------------|-------------------------|--------------|----------------|-----------------|
|                                                                                                                          | Yes<br>n (%)            | No<br>n (%)  | Total<br>N (%) |                 |
| <b>Gender</b>                                                                                                            |                         |              |                | <b>0.05</b>     |
| Male                                                                                                                     | 96<br>(24.8)            | 34<br>(34.3) | 130<br>(26.7)  |                 |
| Female                                                                                                                   | 291<br>(75.2)           | 65<br>(65.7) | 356<br>(73.3)  |                 |
| <b>Age</b>                                                                                                               |                         |              |                | <b>&lt;0.01</b> |
| 20-30                                                                                                                    | 35<br>(9.0)             | 16<br>(16.2) | 51<br>(10.5)   |                 |
| 31-40                                                                                                                    | 61<br>(15.8)            | 28<br>(28.3) | 89<br>(18.3)   |                 |
| 41-50                                                                                                                    | 59<br>(15.2)            | 15<br>(15.2) | 74<br>(15.2)   |                 |
| 51-60                                                                                                                    | 109<br>(28.2)           | 27<br>(27.3) | 136<br>(28.0)  |                 |
| 61-70                                                                                                                    | 106<br>(27.4)           | 9 (9.1)      | 115<br>(23.7)  |                 |
| 71 and over                                                                                                              | 17<br>(4.4)             | 4 (4.0)      | 21<br>(4.3)    |                 |
| <b>Ethnicity</b>                                                                                                         |                         |              |                | <b>0.68</b>     |
| White                                                                                                                    | 186<br>(48.1)           | 54<br>(54.5) | 240<br>(49.4)  |                 |
| Mixed/Multiple ethnic groups                                                                                             | 20<br>(5.2)             | 5 (5.1)      | 25<br>(5.1)    |                 |
| Asian/Asian British                                                                                                      | 118<br>(30.5)           | 25<br>(25.3) | 143<br>(29.4)  |                 |
| Black/African/Caribbean/Black British                                                                                    | 63<br>(16.3)            | 15<br>(15.2) | 78<br>(16.0)   |                 |
| <b>Body mass index (BMI)</b>                                                                                             |                         |              |                | <b>0.80</b>     |
| Underweight                                                                                                              | 11<br>(3.6)             | 4 (5.1)      | 11<br>(3.6)    |                 |
| Normal weight                                                                                                            | 140<br>(45.3)           | 38<br>(48.7) | 178<br>(46.0)  |                 |
| Overweight                                                                                                               | 109<br>(35.3)           | 26<br>(33.3) | 135<br>(34.9)  |                 |
| Obese                                                                                                                    | 49<br>(15.9)            | 10<br>(12.8) | 59<br>(15.2)   |                 |
| <b>Medical conditions</b>                                                                                                |                         |              |                | <b>0.20</b>     |
| Liver problems                                                                                                           | 9 (2.4)                 | 2 (2.0)      | 11 (2.3)       |                 |
| Kidney problems                                                                                                          | 31 (8.2)                | 12 (12.1)    | 43 (9.0)       |                 |
| Coeliac disease/Crohn's disease/ulcerative colitis                                                                       | 12 (3.2)                | 0 (0.0)      | 12 (2.5)       |                 |
| No, I don't have any of these                                                                                            | 327<br>(86.3)           | 85 (85.9)    | 412<br>(86.2)  |                 |
| <b>Regrouped medical conditions</b>                                                                                      |                         |              |                | <b>0.91</b>     |
| Absent                                                                                                                   | 327<br>(86.3)           | 85 (85.9)    | 412<br>(86.2)  |                 |
| Present                                                                                                                  | 52 (13.7)               | 14 (14.1)    | 66 (13.8)      |                 |
| <b>From the skin types (colours) in this picture, which skin type do you think that best describes your skin colour?</b> |                         |              |                | <b>0.25</b>     |
| Type 1 LIGHT, pale white - Always burns, Never tans                                                                      | 27<br>(7.0)             | 12<br>(12.1) | 39<br>(8.0)    |                 |
| Type 2 WHITE, fair (Usually Burns, Tans with difficulty)                                                                 | 90<br>(23.3)            | 27<br>(27.3) | 117<br>(24.1)  |                 |

|                                                                                                            |               |              |               |                 |
|------------------------------------------------------------------------------------------------------------|---------------|--------------|---------------|-----------------|
| Type 3 MEDIUM WHITE TO OLIVE (Sometimes mild burns, gradually tans to Olive)                               | 114<br>(29.5) | 27<br>(27.3) | 141<br>(29.0) |                 |
| Type 4 OLIVE, moderate brown (Rarely burns, Tans with ease to a Moderate Brown)                            | 83<br>(21.4)  | 13<br>(13.1) | 96<br>(19.8)  |                 |
| Type 5 BROWN, dark brown (Very rarely burns, Tans very easily)                                             | 53<br>(13.7)  | 16<br>(16.2) | 69<br>(14.2)  |                 |
| Type 6 BLACK, very dark brown to black (Never burns, Tans very easily, deeply pigmented)                   | 20<br>(5.2)   | 4<br>(4.0)   | 24<br>(4.9)   |                 |
| <b>Number of hours a day spent on the average outside in the sunlight in the spring &amp; summer month</b> |               |              |               | <b>0.05</b>     |
| Less than 1 hour                                                                                           | 152<br>(39.3) | 33<br>(33.3) | 185<br>(38.1) |                 |
| Between 1 - 3 hours                                                                                        | 195<br>(50.4) | 46<br>(46.5) | 241<br>(49.6) |                 |
| Between 3 - 5 hours                                                                                        | 30<br>(7.8)   | 16<br>(16.2) | 46<br>(9.5)   |                 |
| More than 5 hours                                                                                          | 10<br>(2.6)   | 4<br>(4.0)   | 14<br>(2.9)   |                 |
| <b>On average how much do you cover up during the spring/summer months?</b>                                |               |              |               | <b>&lt;0.01</b> |
| Minimal coverage (exposure of shoulders and above the knee)                                                | 54<br>(14.0)  | 29<br>(29.3) | 83<br>(17.1)  |                 |
| Moderate coverage (exposure of forearms, below knee and face)                                              | 274<br>(70.8) | 61<br>(61.6) | 335<br>(68.9) |                 |
| Maximum coverage (exposure only to hands and face)                                                         | 59<br>(15.2)  | 9<br>(9.1)   | 68<br>(14)    |                 |

116 (33%) female respondents were in the menopausal phase. Over half of the respondents (275;57%) claimed they did not have any dietary requirements. 80 respondents (17%) stated that they were vegetarian whilst 50 (10%) followed a halal diet. Other recorded diets were included for analysis; however, few respondents chose them. The e-survey included Fitzpatrick-informed (26) pictorial and descriptive skin colours. 141 respondents, that is nearly a third (29%) of the respondents coded themselves as being Type 3 (Medium, white to olive), with 24% (117) saying they had Type 2 (White, fair) skin type and colour whilst 20% (96) coded themselves as Type 4 darker skin colouring (Olive, moderate brown).

There was no significant association between Vitamin D intake and ethnicity (p-value 0.68), BMI (p-value 0.80; not all respondents provided their BMI data), medical condition (p-value 0.20) (medical condition regrouped (p-value 0.91), and skin type (p-value=0.25); however, statistically significant association was seen with vitamin D intake and gender (p-value 0.05), age (p-value <0.01), sun exposure(Q23) (p-value 0.05), and skin coverage (Q24) (p-value <0.01) (Table 1)

### **Awareness of Vitamin D information sources, benefits and testing**

To understand the level of the community's knowledge on vitamin D, seven multiple-choice questions were included in the e-survey. When asked where they had heard of vitamin D in the past, around three quarters (75%) indicated that they had known about it generally, whilst just over 60% said they had received their information from health professionals, with under half equally saying that they had heard about vitamin D from family and friends (45%) or the media (43%).

When asked what the two most useful sources of health information were, over 70% indicated these to be health professionals (371;77%) to include doctors, nurses and pharmacists, and the NHS website (343;71%) as their preferred options. Around a third (32%) used the internet or other media to include TV, newspapers, radio, internet and magazines, for health information.

Respondents perceived vitamin D to have the following health benefits: around 80% felt that vitamin D helped support the immune system (399;82%) and prevented osteoporosis or brittle bones (379;78%), with over 60% indicating that vitamin D could help prevent rickets (308;64%), also often colloquially referred to as “soft bones” in children. Some 480 (99%) respondents thought that people could increase their vitamin D levels with sunlight exposure, with 430 (89%) considering this could be achievable by taking supplements. Some 76% (369) felt dietary intake could help in this regard. When asked for their opinion on the two best ways to increase vitamin D levels, respondents chose sunlight and supplements (94% and 70% respectively).

Respondents were asked about who they thought would be at a higher risk of low levels of vitamin D, with most (87%) selecting option '*people who do not spend a lot of time outside during the day*', with 76% (367) indicating '*people who cover up the majority of their skin when they are outside*' and around 307(63%) choosing those with dark skin. When questioned about factors affecting vitamin D levels, most (90%) chose '*not getting enough sunlight*', with 82% choosing the option '*not spending time outside during the day*'.

When asked what the recommended daily intake of vitamin D in the UK is, a third of the respondents (34%) said this was 10 micrograms (400 IU), with a further 27% indicating 25 micrograms (1000 IU) but with nearly a quarter of respondents (24%) saying that they did not know.

Half of the respondents (51%) had previously had a blood test to check their vitamin D levels, with 40% saying that they had not had a test. Around 9% were not sure. When asked if they thought vitamin D testing should be part of the regular NHS health checks, the majority (425;91%) selected the option 'agree'. Respondents (388;80%) also agreed with the statement that those who are in the risk category of vitamin D deficiency (such as older patients, pregnant women & people with dark skin tones) should get regular testing.

### **Sun exposure**

Half of the respondents (241;50%) spend on average 1-3 hours in the sunlight in the spring and summer months, whereas around 185 (38%) said this was less than 1 hour for them. The majority (70%) indicated usually having moderate coverage (exposure of forearms, below knee and face); just under a fifth (17%) said that they had minimal coverage (exposure of shoulders and above the knee). 66 (14%) respondents coded themselves as having maximum coverage, with exposure of only their hands and face, of whom 59 said that they took a vitamin D supplement (Table 1).

There was a statistically significant association between ethnicity and skin colour (p-value 0.01) in our respondent sample (Table 1), but no significant association between hours of sun exposure and skin type (p-value 0.63), and Vitamin D supplement intake

(p-value 0.20) (Table 2). Skin coverage was seen to be significantly associated with ethnicity (p-value <0.01), skin colour (p-value 0.04), and Vitamin D intake both for those who had taken supplements over the last year or for longer (p-value <0.01). With statistically significant association between vitamin D intake and gender (p-value 0.05), age (p-value 0.01), sun exposure (p-value 0.05) and skin coverage (p-value <0.01) (Table 2), logistic regression analysis was undertaken to assess the effect of age on vitamin D intake, with adjustment for gender and ethnicity. This showed that with every one unit increase in age, with each unit equating to a 10-year period, there was likely to be a 30% decrease in vitamin D supplement intake (adj. OR=0.70,95% CI (0.59-0.83)).

**Table 2: Association between ethnicity, skin colour and Vit-D supplement intake with hours of sun exposure and skin coverage.**

|                                                | Total<br>N (%) | Hours of sun exposure (Q.23)       |                                    |                                    | p-<br>value     | Skin Coverage (Q.24)                |                              |                               | p-<br>value     |
|------------------------------------------------|----------------|------------------------------------|------------------------------------|------------------------------------|-----------------|-------------------------------------|------------------------------|-------------------------------|-----------------|
|                                                |                | Less<br>than<br>1<br>hour<br>n (%) | Between<br>1 - 3<br>hours<br>n (%) | Between<br>3 - 5<br>hours<br>n (%) |                 | More<br>than<br>5<br>hours<br>n (%) | Minimal<br>coverage<br>n (%) | Moderate<br>coverage<br>n (%) |                 |
| <b>Ethnicity</b>                               |                |                                    |                                    |                                    | <b>&lt;0.01</b> |                                     |                              |                               | <b>&lt;0.01</b> |
| White                                          | 239<br>(45.2)  | 69<br>(37.3)                       | 134<br>(55.6)                      | 29 (63.0)                          | 8<br>(57.1)     | 41 (49.4)                           | 179<br>(53.4)                | 20 (29.4)                     |                 |
| Mixed/Multiple ethnic<br>groups                | 14 (2.6)       | 10<br>(5.4)                        | 11 (4.6)                           | 3 (6.5)                            | 1<br>(7.1)      | 9 (10.8)                            | 12 (3.6)                     | 4 (6.1)                       |                 |
| Asian/Asian-British                            | 135<br>(25.5)  | 70<br>(37.8)                       | 57 (23.7)                          | 12 (26.1)                          | 4<br>(26.1)     | 19 (22.9)                           | 94 (28.1)                    | 30 (45.5)                     |                 |
| Black/African/Caribbean                        | 78 (14.7)      | 36<br>(19.5)                       | 39 (16.2)                          | 2 (4.3)                            | 1<br>(7.1)      | 14 (16.9)                           | 50 (14.9)                    | 14 (21.2)                     |                 |
| <b>Skin colour</b>                             |                |                                    |                                    |                                    | 0.63            |                                     |                              |                               | <b>0.03</b>     |
| Type 1 light, pale white                       | 39 (8)         | 15<br>(8.1)                        | 19 (7.9)                           | 4 (8.7)                            | 1<br>(7.1)      | 3 (3.6)                             | 28 (8.4)                     | 8 (11.8)                      |                 |
| Type 2 white, fair                             | 117(24.1)      | 42<br>(22.7)                       | 63 (26.1)                          | 10 (21.7)                          | 2<br>(14.3)     | 14 (16.9)                           | 91 (27.2)                    | 12 (17.6)                     |                 |
| Type 3 medium, white<br>to olive               | 141 (29)       | 46<br>(24.9)                       | 72 (29.9)                          | 16 (34.8)                          | 7<br>(50.0)     | 33 (39.8)                           | 91 (27.2)                    | 17 (25.8)                     |                 |
| Type 4 olive, moderate<br>brown                | 96 (19.8)      | 43<br>(23.2)                       | 40 (16.6)                          | 10 (21.7)                          | 3<br>(21.4)     | 16 (19.3)                           | 66 (19.7)                    | 14 (21.2)                     |                 |
| Type 5 brown, dark<br>brown                    | 69 (14.2)      | 30<br>(16.2)                       | 32 (13.3)                          | 6 (13.0)                           | 1<br>(7.1)      | 13 (15.7)                           | 40 (11.9)                    | 16 (24.2)                     |                 |
| Type 6 black, very dark<br>brown to black      | 24 (4.9)       | 9<br>(4.9)                         | 15 (6.2)                           | 0 (0.0)                            | 0<br>(0.0)      | 4 (4.8)                             | 19 (5.7)                     | 1 (1.5)                       |                 |
| <b>Vit-D supplement intake</b>                 |                |                                    |                                    |                                    | 0.20            |                                     |                              |                               | <b>&lt;0.01</b> |
| Yes recently (in the last<br>12 months)        | 205<br>(42.2)  | 76<br>(41.1)                       | 108<br>(44.8)                      | 16 (34.8)                          | 5<br>(35.7)     | 26 (31.3)                           | 153<br>(45.7)                | 26 (38.2)                     |                 |
| Yes, for a number of<br>years                  | 182<br>(37.4)  | 76<br>(41.1)                       | 87 (36.1)                          | 14 (30.4)                          | 5<br>(35.7)     | 28 (33.7)                           | 121<br>(36.1)                | 33 (50.0)                     |                 |
| No                                             | 99 (20.4)      | 33<br>(17.8)                       | 46 (19.1)                          | 16 (34.8)                          | 4<br>(28.6)     | 29 (34.9)                           | 61 (18.2)                    | 9 (13.2)                      |                 |
| <b>Vit-D supplement intake<br/>(Regrouped)</b> |                |                                    |                                    |                                    | <b>0.05</b>     |                                     |                              |                               | <b>&lt;0.01</b> |
| Yes                                            | 387 (80)       | 152<br>(82.2)                      | 195<br>(80.9)                      | 30 (65.2)                          | 10<br>(71.4)    | 54 (65.1)                           | 274<br>(81.8)                | 59 (86.8)                     |                 |
| No                                             | 99 (20)        | 33<br>(17.8)                       | 46 (19.1)                          | 16 (34.8)                          | 4<br>(28.6)     | 29 (34.9)                           | 61 (18.2)                    | 9 (13.2)                      |                 |



- There was no significant association between hours of sun exposure and skin type (p-value 0.63), and Vitamin D supplement intake (p-value 0.20), however significant association could be seen with ethnicity (p-value <0.01), and Vitamin D intake question when regrouped (p-value 0.05).
- Skin coverage was seen to be significantly associated with ethnicity (p-value <0.01), skin colour (p-value 0.03), Vitamin D intake (p-value 0.01), and Vitamin D intake regrouped (p-value <0.01).

## Supplements

Around 42% had taken vitamin D supplements within the last 12 months, just over a third (37%) had been taking them for some years, but with a fifth (20%) saying they did not take supplements. More than half (57.0%) of respondents were taking other vitamins or supplements; including calcium, collagen, hair, skin & nail, iron, magnesium, combined multi-vitamins, Omega 3, rosehip, vitamin B, B12, C, D & E and zinc. Over half (51.4%) of the respondents would be prepared to pay '*less than £5*' for vitamin D supplements for a month, with around a third (35.3%) indicating that they would pay between £5-10 for a month's supply. Respondents selected '*strongly agree*' and '*agree*' when reviewing the following statements: '*People at risk of vitamin D deficiency should get free vitamin D supplements*' and '*Doctors should check vitamin D levels before recommending supplements*' but did not think people should pay for their vitamin D supplements regardless.

When asked which factors were important to them when choosing vitamin D supplements, responses included aspects such as more information about the benefits of vitamin D, advice from health professionals (see Box 1), easy access to the doses required and the cost of supplements. Pharmaceutical formulation modifications such as the supplement containing other vitamins, nutrients & minerals, or the taste, flavour and smell of the supplement or how easy the supplement was to chew, or swallow were classified as '*neutral or important*'. Whether the supplement was available in liquid form was classified as '*neutral and unimportant*'.

**Box 1: E-survey respondents were asked which factors were important to them when choosing vitamin D supplements; the following were selected as 'Very Important or Important':**

- Knowledge about the health benefits of vitamin D
- Advice from health professionals
- Low vitamin D levels on blood tests
- Experiencing symptoms of low vitamin D levels
- Reduced exposure to sunlight
- Easy access to the supplement
- Access to the appropriate dosage over the counter (without prescription)
- Cost of supplementation
- How often I need to take the supplement.

**Fortified Foods**

Many respondents (62%) said they would prefer to have foods that are fortified with vitamin D instead of taking separate supplements. When asked for what reason they might not want foods with added vitamin D, over 40% (42%) said they did not like the idea of eating processed or fortified foods, and around 16% thought it would be too expensive. A fifth of respondents (22%) provided further reasons using free text on why they would rather not have fortified foods (see Box 2). These included a preference to supplement, unable to or did not include standard fortified foods that were currently available within their diet, being unsure about the dosage of vitamin D within fortified foods and wanting the choice to make their own decisions.

**Box 2: Barriers towards fortified foods – free text quotes**

|                                 |                                                                                                                                                                                                                                                                                                                                                                                                                                                                                                                                                                                                                                                                                                                                                                                                                                                          |
|---------------------------------|----------------------------------------------------------------------------------------------------------------------------------------------------------------------------------------------------------------------------------------------------------------------------------------------------------------------------------------------------------------------------------------------------------------------------------------------------------------------------------------------------------------------------------------------------------------------------------------------------------------------------------------------------------------------------------------------------------------------------------------------------------------------------------------------------------------------------------------------------------|
| <b>Preference to supplement</b> | <ul style="list-style-type: none"> <li>• Because the amount of intake could be variable from day to day. It is easier to take a supplement and then top up with food</li> <li>• Can regulate exactly how much I get from taking a supplement, would worry I wasn't getting enough from fortified foods</li> <li>• Easier to eat normal food and take the supplement</li> <li>• Easier to increase intake through supplementation if the type of foods that are fortified are not part of your normal daily diet</li> <li>• Easier to just take a tablet &amp; then you know how much you have taken</li> <li>• I don't like some of the foods that would be fortified with vitamin D and would know I was getting the right amount through tablets</li> <li>• I think supplements will also be required in addition to foods containing vit D</li> </ul> |
|---------------------------------|----------------------------------------------------------------------------------------------------------------------------------------------------------------------------------------------------------------------------------------------------------------------------------------------------------------------------------------------------------------------------------------------------------------------------------------------------------------------------------------------------------------------------------------------------------------------------------------------------------------------------------------------------------------------------------------------------------------------------------------------------------------------------------------------------------------------------------------------------------|

|                                                         |                                                                                                                                                                                                                                                                                                                                                                                                                                                                                                                                                                                                                                                                                                                                                                                                                                                                                                                                                          |
|---------------------------------------------------------|----------------------------------------------------------------------------------------------------------------------------------------------------------------------------------------------------------------------------------------------------------------------------------------------------------------------------------------------------------------------------------------------------------------------------------------------------------------------------------------------------------------------------------------------------------------------------------------------------------------------------------------------------------------------------------------------------------------------------------------------------------------------------------------------------------------------------------------------------------------------------------------------------------------------------------------------------------|
|                                                         | <ul style="list-style-type: none"> <li>• Not as good as taking supplements</li> <li>• It's far more convenient to take one supplement with the exact dosage you need.</li> </ul>                                                                                                                                                                                                                                                                                                                                                                                                                                                                                                                                                                                                                                                                                                                                                                         |
| <b>Unable or don't eat the standard fortified foods</b> | <ul style="list-style-type: none"> <li>• Being diabetic, may not be able to have those certain items of food that has vit D, also being vegetarian, also I need very high doses of vit D and foods with vit D would probably not be enough (difficult to calculate each item every day)</li> <li>• Dependant on what foods are fortified. I don't drink orange juice regularly as it contains a lot of sugar. I also don't eat a lots of bread and only eat wholemeal.</li> <li>• I don't want to buy products that I wouldn't buy regularly (e.g., orange juice) just because of the addition of Vitamin D</li> <li>• I have to careful what I eat, e.g orange juice is high in sugar and I am a diabetic</li> <li>• Unable to drink milk or orange juice</li> <li>• It would limit my choosing option and may affect price</li> <li>• I follow Keto eating plan and fortified foods may not be suitable</li> <li>• I have absorption issues</li> </ul> |
| <b>Unsure about dosage in fortified foods</b>           | <ul style="list-style-type: none"> <li>• Harder to ensure getting enough vitamin d</li> <li>• Harder to manage a households vitamins needs</li> <li>• I don't know if it has as much vit d as a supplement would</li> <li>• I would like to know how much I am taking and be in control.</li> <li>• I would not be able to track my vitamin d level intake a day if multiple foods have vitamin D as well</li> <li>• I would be unsure if I would hit the required daily requirements.</li> <li>• I would rather take my own dosage and then I know I have had the right amount</li> <li>• I wouldn't know how to ensure I'm getting my recommended supplement dose</li> <li>• Unlikely to be a high enough dose. You wouldn't know how much the foods cumulatively would add up to</li> </ul>                                                                                                                                                           |
| <b>Wanting to make own decision</b>                     | <ul style="list-style-type: none"> <li>• I think it should be down to an individual and their choice not forced upon them in products per say.</li> <li>• I prefer to have a choice and make my own decisions about my health rather than be coerced</li> <li>• Individuals should be able to choose</li> <li>• I prefer to make my own decision</li> <li>• I probably already eat fortified cereals, I just have no preference</li> <li>• I want to know what I am taking</li> </ul>                                                                                                                                                                                                                                                                                                                                                                                                                                                                    |

## Discussion

### Key messages

- Awareness about vitamin D was high within our diverse community respondent sample
  - All respondents (99%) indicated that sun exposure was a source for vitamin D
  - Many felt that the two best ways to increase vitamin D levels were sun exposure (94%) and supplementation (70%)

- Trusted sources for vitamin D information rated highly included health professionals and the NHS Website
- Paying for vitamin D supplements
  - Around 50% respondents prepared to pay up to £5 for month's supply
  - A good third (35%) prepared to pay between £5-£10 per month
- With increasing age there was reduced intake of vitamin D supplements, which could be a concern in deficiency status often seen in the elderly
- General acceptance of food fortification but confusion on how much vitamin D would be available from food sources and how to balance intake with supplemented doses

This cross-sectional e-survey generated a wide range of helpful findings. Our respondent profile reflects the views of a female dominant, elderly, generally healthy and educated cohort. Around 50% classified themselves as overweight or obese, with 14% of respondents indicating that they had chronic ill health. We were successful in eliciting views on knowledge, attitudes, and practices around vitamin D from a diverse community population, which included a large proportion of Black and minority ethnic individuals, via this online survey questionnaire research study. There was a high level of awareness of vitamin D and its benefits within the community. We received feedback on issues ranging from valued sources of information, benefits and testing for vitamin D levels, on sun exposure and sunlight as a source of vitamin D and perceptions of the at-risk populations, and with views provided on testing, supplementation, and fortification. Many of our respondents were already taking supplements or therapeutic doses related to their underlying illnesses. When, how, for what duration, and the dose that Vitamin D supplementation should be recommended for, for beneficial outcomes is a common, often posed question in clinical practice. The answer will vary depending on whether this is being considered in the context of population wide public health advice versus supporting '*patients*' as individuals with a

medical condition where their vitamin D status needs to be addressed as part of their holistic management plan (4,15,28). At a population level, this community wanted clear guidance on vitamin D status, and information to balance vitamin supplementation, food fortification and sun exposure.

### **The way forward: Supplementation, fortification or safe sun exposure?**

Awareness of vitamin D was high in our community sample, so current public health messaging is getting some results; but there still was some confusion on vitamin D doses needed and how to balance this with sunshine exposure and dietary intake.

### **Supplementation**

#### **Vitamin D supplementation:**

Our 'healthy' e-survey respondents provided useful feedback by classifying various factors (see Box 1) as important when considering supplementation. These included improving knowledge about the health benefits of vitamin D, with advice provided by health professionals as key, assessing for low vitamin D levels by testing, and addressing symptoms of low vitamin D levels and reduced exposure to sunlight. These criteria should inform public health information leaflets. Pertinent to purchase of supplements were aspects such as easy access, availability at the appropriate dosage over the counter (without prescription) and cost. Respondents did not feel that pharmaceutically oriented formulation issues were of concern, and this maybe as these have already been addressed by manufacturers; for example, vitamin D supplements can be combined with other vitamins, nutrients and minerals, and taste, flavour, smell or how easy the supplement is to chew or swallow and availability in

liquid form has been addressed, with a range of products available from pharmacies or health food stores.

### **Affordability of supplements:**

Interestingly on the issue of costs, with reference to purchasing vitamin D supplements, although half of our respondents said that they would be prepared to pay less than £5 for a month's supply, a good third (35%) was prepared to pay between £5-£10 per month. The wish to have some control over dosage, which is feasible when taking supplements, and to make one's own choice were key issues highlighted by the respondents (Box 2 presents a summary of open text statements from respondents).

The problem with regards to affordability has been compounded by recent changes to policy for prescriptions of vitamin D. Recent government advice to health professionals in England is that it is appropriate to request that patients increase or maintain their vitamin D levels in range by purchasing over the counter (OTC) supplements at their own expense (29), in most cases. Although this may help reduce the NHS financial burden, this shifts the burden of vitamin D supplementation onto patients. In the context of large families, increasing unemployment, low incomes and cuts to social support, many individuals/families, may forego vitamin D supplementation in favour of other expenses they deem more essential. Consequently, rates of VDD may rise. This maybe a particularly severe issue for black and minority ethnic populations who are disproportionately on low income, not in employment and reliant on social support (30). In work undertaken with the Somali community, Lee C et al also reported that many in the community felt that if their doctor did not provide a prescription, then in line with perception that they had a healthy diet, they would not purchase vitamin D

supplements (24). Our findings also suggest that as the community gets older, there is a reduction in use of vitamin D supplements; with around 30% reduction in vitamin D intake with every increase in age units of 10 years. This may be due to elderly people not being able to afford buying vitamin D supplements or alternatively they may have these being prescribed. We did not ask about prescribed supplements in people aged 60 and over, when there are no NHS prescription charges applied; but generally, we would have expected the respondent to still indicate that they were taking supplements, whether purchased or prescribed.

### **Fortification:**

Considering the issue of fortification, Rajwar E et al (2020) (31) recently conducted an overview of systematic reviews and reported a lack of robust evidence to support fortification of food with vitamin D and calcium for public health benefits; their review focused on the micronutrient's vitamin A, vitamin D and calcium. Their studies targeted women of reproductive age. However, many proponents have and do argue in favour of fortification (6,32,33) and in industrialised countries the routine fortification of certain staple foods with vitamin D is common practice (34,35). These foods include milk, cereal, juice, bread, yogurt, and cheese (36,37). Margarine fortification was mandatory in Denmark until 1985, when a political decision led to policy discontinuation (38) Duus KS et al (2021) (38) noted that around 13% of the population's vitamin D intake at the time had been from fortified margarine. In the UK, margarine fortification was mandated between 1940 to 2013 (39). Work undertaken to study populations living in India with its tropical climate (40) indicates that Indian diets, particularly where a vegetarian diet is followed, that these do not meet the daily requirement of vitamin D for a normal adult. The research group (40) recommended the establishment of



national programs directed at policy makers in India, to consider fortification of various foods. Fortified foods available in India include *Vanaspati Dalda* ghee, manufactured from hydrogenated and hardened vegetable oils and fortified with 200 IU of vitamin D per 100 g and certain branded milk products (40). In western dwelling South Asian populations, food fortification of chappati flour and increased use of vitamin D supplements has been recommended (41). Food fortification could be a cost-effective way forward, as a preventative strategy (42), aiming to reduce the prevalence of vitamin D deficiency status in a population.

An important question is how much should staple food items be fortified with? A systematic review (37) with high evidence quality, showed that food fortification improved 25(OH)D concentration by a mean difference of 15.51 nmol/l, resulting in a mean increase of 3nmol/l for every 100 IU of vitamin D, after adjusting for baseline 25(OH)D concentration and country latitude. Controlling for country latitude was the marker used for sun exposure. The prevalence of vitamin D deficiency was lower with a risk ratio of 0.53, and cognitive function improved by a mean difference of 1.22 intelligence quotient points in healthy children aged between one and eighteen. Brandão-Lima PN et al reported an increase in the serum concentrations of 25(OH)D with the consumption of dairy fortified foods, in children aged between two and eleven, who were able to achieve or maintain vitamin D sufficiency status (36).

Although some 60% of our respondents said that they would prefer to have foods fortified with vitamin D instead of taking separate supplements, many respondents provided informative contextualised reasons on why they did not like the idea of eating processed or fortified foods (see Box 2). Reasons for preferring supplementation

included worrying about not getting enough vitamin D from fortified food and that having fortified foods would not be as good as taking supplements, it would be easier to know how much you have taken if you '*just take a tablet*' and '*far more convenient*', and that it would be '*easier*' to take a supplement with '*normal*' non-fortified food, especially if fortified foods were those not usually part of '*your normal diet*'. A particular issue that was flagged up was being unable to have fortified foods, as in the case of a diabetic having to control sugar intake or being a vegetarian or someone following particular diet plans, which would limit food options. Price of fortified foods was a concern, with respondent's saying that they did not '*want to buy products I wouldn't buy regularly*' or '*it would limit my choosing option and may affect price*'.

In their global consensus publication, Munns CF et al make recommendations for the prevention and management of nutritional rickets; these include safe sun exposure, vitamin D supplementation, combined with the strategic fortification of normal habitual foods accompanied by adequate dietary calcium intake (5). The fortification of milk with vitamin D in the 1930s effectively eradicated rickets worldwide (43-45). However, research has also shown (46,47), that fortification alone is not enough, and that additional vitamin D supplementation is needed to achieve sufficiency status in at-risk populations.

### **Sun exposure:**

With reference to sun exposure, our analysis found that skin coverage was significantly associated both with ethnicity (p-value 0.01) and skin colour (p-value 0.03) and vitamin D intake (p-value <0.01) (Table 2). Therefore, targeting at-risk groups, whether based on ethnicity or skin colour, maybe just as effective. Hakim OA et al (16)

undertook a UK-based study, finding that despite consistently lower 25(OH)D levels in South Asian women, they were shown to synthesise vitamin D as efficiently as Caucasians when exposed to the same dose of ultra-violet radiation. The baseline level of vitamin D rather than ethnicity and skin tone influenced the amount of vitamin D synthesised (16). An evidence technological assessment (48) included eight randomized trials of ultraviolet (UV)-B radiation (both artificial and solar exposure) and reported a positive effect on serum 25(OH)D concentrations; however, limitations included the overall fewer number of participants and heterogeneity when considering the exact UV-B dose and 25(OH)D assay used. Cranney A et al could not determine how the 25(OH)D levels varied by ethnicity, sunscreen use or latitude (48). Using New Zealand for their population case study, Callister's research group (49) tried to evaluate whether ethnicity could be used as a determinant for sun exposure health promotion messaging. Ethnicity is a cultural construct, and with ethnic intermarriage, there is a possible weakening of the relationship between ethnicity and skin colour. They recommended that skin colour and other variables such as the season and time of day were criteria that should inform the discussion of risks of sun exposure rather than simply targeting ethnic groups and suggested that direct measures of skin type may be beneficial when assessing the risks and benefits of sun exposure (49). There is a need for more work with ethnic minority groups on what level of sun exposure may be needed depending on the individual's skin colour and how this could be culturally facilitated. Simplistic targeting of public health messaging on sun exposure based on ethnicity may not be the way forward.

Vitamin D is not the solution for all ills, but deficiency is widespread and the evidence for primary and secondary prevention is good. From a public health perspective, this

is a particularly relevant message for at-risk black and minority ethnic groups (5,6). A worldwide public health intervention that includes vitamin D supplementation in certain risk groups, with systematic vitamin D food fortification to avoid severe vitamin D deficiency in the general population, has been proposed as an appropriate and acceptable public health strategy. With its rare side effects and relatively wide safety margin (5, 50), vitamin D supplementation can be an effective, inexpensive, and safe adjuvant therapy for those with confirmed deficiency. In addition to advice on supplementation aimed at at-risk groups, population-wide based public health advice needs to incorporate information relevant to intake of fortified foods and sun exposure. Facilitators would include clear labelling of fortified foods and providing information on appropriate supplement doses as well as safe sun exposure. The information should be available from health professionals and on the NHS website, which many of our respondents indicated were their go-to sources for information. Around 15% of our respondents use the internet or other media for information, and these forums can be useful for the community with poor literacy (24).

### **Strengths and Limitations**

To our knowledge, this is the first study to explore knowledge, attitudes and practices around Vitamin D in the UK population following the national lockdowns during the COVID-19 pandemic. It included a simple study framework, using iteratively developed online survey questions facilitated via the Qualtrics platform, which allowed us to obtain data from a range of respondents, in a time efficient way. We had a large sample size of respondents with good representation of different ethnicities. A limitation that needs to be considered is the higher healthy, educated respondent

profile, which could be due to greater social media literacy and mitigated by the fact that their responses will enable us to ensure care for a population with ill health. Findings from this exploratory study could inform the development of a larger and more complex study with support from local councils, primary care and voluntary organisations to reach the wider UK population. Including the survey questions translated in other languages would also help widen access.

## Conclusion

In summary, we were successful in eliciting views on knowledge, attitudes, and practices around vitamin D from a diverse community population, including a large proportion of black and minority ethnic individuals. This online survey provides evidence that public health messaging about the health effects of Vitamin D is being acknowledged. Around four in ten individuals in our sample were taking some form of Vitamin D supplements. This however leaves a majority not being aware of or not following national guidance. The survey also identified a number of facilitators and barriers for community vitamin D supplementation and fortification which can be used to improve future public health and individual healthcare advice. With regards to sun exposure, both skin colour and ethnicity criteria can be used to inform safe exposure. The community wanted information and guidance to help manage individual vitamin D status, especially for high-risk groups, and on balancing supplementation, food fortification and sun exposure. We have carried out further work using focus group and one to one interview settings, to help build on our knowledge around barriers and facilitators to vitamin D usage, which will be reported in a second paper

## **Ethics**

The study was given ethical approval by Imperial College Research Ethics Committee (ICREC # 20IC6433) on 08/02/2021.

## **Patient and public involvement**

No patient was involved. There was public involvement in the development phase of the questions. Medical students on the research group circulated the e-survey as a pilot project, within friends and family circles, asking them to assess the questions for clarity and ease of understanding. This valuable feedback helped inform the iterative changes and finalising of the e-survey questions. The e-survey was beta-tested, with the online survey technical functionality assessed before being published.

**Data sharing statement:** The data that support the findings of this study are available from the corresponding author, upon reasonable request

**Funding:** This research received no specific grant from any funding agency in the public, commercial or not-for-profit sectors. AEO & IW are in part supported by the National Institute for Health and Care Research (NIHR) Applied Research Collaboration (ARC) North-West London. The views expressed are those of the authors and not necessarily those of the NHS or the NIHR or the Department of Health and Social Care

**Acknowledgements:** Aakriti Shah, Sundar Siddarth, Ioanna Zimianiti, medical students at Imperial College, London for assistance with early background literature searches to inform question design for the online survey, piloting the survey for clarity and ease of understanding and for working with our research team to gain formative research experience with the ethics approval process. Eva F Riboli-Sasco, Research Fellow, Self-Care Academic Research Unit, Imperial College London for peer review support.

**Author Contributors:** All authors provided substantial contributions to the conception (NT, MB, AEO), design (NT, MB, AEO, IW), acquisition (IW, AA), statistical analysis (MK, NT) and interpretation (NT, MB, AEO) of study data and approved the final version of the paper. NT took the lead in planning the study with support from co-authors. MK carried out the data analysis. MB is the guarantor.

**Competing interests:** None declared

# References

1. Bikle DD. Vitamin D and bone. *Curr Osteoporos Rep.* 2012;10(2):151-9.
2. Naeem Z. Vitamin d deficiency-an ignored epidemic. *International journal of health sciences.* 2010;4(1):V.
3. Haines ST, Park SK. Vitamin D Supplementation: What's Known, What to Do, and What's Needed. *Pharmacotherapy: The Journal of Human Pharmacology and Drug Therapy.* 2012;32(4):354-82.
4. National Institute for Health and Care Excellence. Vitamin D: supplement use in specific population groups Public health guideline [PH56]. 2017. <https://www.nice.org.uk/guidance/ph56>
5. Munns CF, Shaw N, Kiely M, Specker BL, Thacher TD, Ozono K, et al. Global Consensus Recommendations on Prevention and Management of Nutritional Rickets. *J Clin Endocrinol Metab.* 2016;101(2):394-415.
6. Ames BN, Grant WB, Willett WC. Does the High Prevalence of Vitamin D Deficiency in African Americans Contribute to Health Disparities? *Nutrients.* 2021;13(2):499.
7. Moncrieff M, Fadahunsi T. Congenital rickets due to maternal vitamin D deficiency. *Archives of Disease in Childhood.* 1974;49(10):810.
8. Bjelakovic G, Gluud LL, Nikolova D, Whitfield K, Wetterslev J, Simonetti RG, Bjelakovic M, Gluud C. Vitamin D supplementation for prevention of mortality in adults. *Cochrane Database Syst Rev.* 2014 Jan 10;(1):CD007470. doi: 10.1002/14651858.CD007470.pub3. PMID: 24414552.
9. Thacher TD, Pludowski P, Shaw NJ, Mughal MZ, Munns CF, Högl W. Nutritional rickets in immigrant and refugee children. *Public Health Rev.* 2016;37:3.
10. Tanna NK, Alexander EC, Lee C, Lakhanpaul M, Popat RM, Almeida-Meza P, et al. Interventions to improve vitamin D status in at-risk ethnic groups during pregnancy and early childhood: a systematic review. *Public Health Nutr.* 2021;24(11):3498-519.
11. Holick MF. Health benefits of vitamin D and sunlight: a D-bate. *Nature Reviews Endocrinology.* 2011;7(2):73-5.
12. Adorini L, Penna G. Control of autoimmune diseases by the vitamin D endocrine system. *Nature clinical practice Rheumatology.* 2008;4(8):404-12.
13. Pittas AG, Chung M, Trikalinos T, Mitri J, Brendel M, Patel K, et al. Systematic review: vitamin D and cardiometabolic outcomes. *Annals of internal medicine.* 2010;152(5):307-14.
14. Burchell K, Rhodes LE, Webb AR. Public Awareness and Behaviour in Great Britain in the Context of Sunlight Exposure and Vitamin D: Results from the First Large-Scale and Representative Survey. *International Journal of Environmental Research and Public Health.* 2020;17(18):6924.
15. National Institute for Health and Care Excellence C. Vitamin D deficiency in adults. 2022. <https://cks.nice.org.uk/topics/vitamin-d-deficiency-in-adults/>
16. Hakim OA, Hart K, McCabe P, Berry J, Francesca R, Rhodes LE, et al. Vitamin D production in UK Caucasian and South Asian women following UVR exposure. *J Steroid Biochem Mol Biol.* 2016;164:223-9.
17. Becker W, Lyhne N, Pedersen AN, Aro A, Fogelholm M, Phorsdottir I, et al. Nordic Nutrition Recommendations 2004-integrating nutrition and physical activity. *Scandinavian Journal of Nutrition.* 2004;48(4):178-87.
18. Scientific Advisory Committee on Nutrition. Vitamin D and health. 2016. Report available online at: <https://www.gov.uk/government/groups/scientific-advisory-committee-on-nutrition>
19. Pilz S, Zittermann A, Trummer C, Theiler-Schwetz V, Lerchbaum E, Keppel MH, et al. Vitamin D testing and treatment: a narrative review of current evidence. *Endocr Connect.* 2019;8(2):R27-R43.
20. Gov.UK. Statement from PHE and NICE on vitamin D supplementation during winter 2020. Available from: <https://www.gov.uk/government/publications/vitamin-d-supplementation-during->

[winter-phe-and-nice-statement/statement-from-phe-and-nice-on-vitamin-d-supplementation-during-winter.](#)

21. Shafinaz IS, Moy FM. Vitamin D level and its association with adiposity among multi-ethnic adults in Kuala Lumpur, Malaysia: a cross sectional study. *BMC Public Health*. 2016;16:232.
22. Day RE, Krishnarao R, Sahota P, Christian MS. We still don't know that our children need vitamin D daily: a study of parents' understanding of vitamin D requirements in children aged 0-2 years. *BMC Public Health*. 2019;19(1):1119.
23. O'Connor C, Glatt D, White L, Revuelta Iniesta R. Knowledge, attitudes and perceptions towards vitamin D in a UK adult population: a cross-sectional study. *International journal of environmental research and public health*. 2018;15(11):2387.
24. Lee C, Tanna N, Blair M, Yusuf Y, Khalief H, Lakhanpaul M. Getting underneath the skin: A community engagement event for optimal vitamin D status in an 'easily overlooked' group. *Health Expect*. 2019;22(6):1322-30.
25. Ioanna Zimianiti. Updates on my experience working on the vitamin D study 2020 Available from: <http://imperialprimarycare.blogspot.com/?m=1>.
26. Sharma AN, Patel BC. *Laser Fitzpatrick Skin Type Recommendations*. StatPearls. Treasure Island (FL): StatPearls Publishing. Copyright © 2022, StatPearls Publishing LLC.; 2022.
27. Eysenbach G. Improving the quality of Web surveys: the Checklist for Reporting Results of Internet E-Surveys (CHERRIES). *J Med Internet Res*. 2004;6(3):e34.
28. National Osteoporosis Guideline Group (NOGG). Clinical guideline for the prevention and treatment of osteoporosis. Updated September 2021. <https://www.nogg.org.uk/full-guideline>
29. England N, Improvement N. Items which should not routinely be prescribed in primary care: guidance for CCGs. See [www.england.nhs.uk/wp-content/uploads/2017/11/items-which-should-not-be-routinely-prescribed-in-pc-ccg-guidance-pdf-2017](http://www.england.nhs.uk/wp-content/uploads/2017/11/items-which-should-not-be-routinely-prescribed-in-pc-ccg-guidance-pdf-2017).
30. McFadden A, Green JM, McLeish J, McCormick F, Williams V, Renfrew MJ. Healthy Start vitamins—a missed opportunity: findings of a multimethod study. *BMJ open*. 2015;5(1).
31. Rajwar E, Parsekar SS, Venkatesh BT, Sharma Z. Effect of vitamin A, calcium and vitamin D fortification and supplementation on nutritional status of women: an overview of systematic reviews. *Systematic Reviews*. 2020;9(1):248.
32. Pilz S, März W, Cashman KD, Kiely ME, Whiting SJ, Holick MF, et al. Rationale and Plan for Vitamin D Food Fortification: A Review and Guidance Paper. *Front Endocrinol (Lausanne)*. 2018;9:373.
33. Wacker M, Holick MF. Sunlight and Vitamin D: A global perspective for health. *Dermatoendocrinol*. 2013;5(1):51-108.
34. Palacios C, Gonzalez L. Is vitamin D deficiency a major global public health problem? *J Steroid Biochem Mol Biol*. 2014;144 Pt A:138-45.
35. Itkonen ST, Erkkola M, Lamberg-Allardt CJE. Vitamin D Fortification of Fluid Milk Products and Their Contribution to Vitamin D Intake and Vitamin D Status in Observational Studies—A Review. *Nutrients*. 2018;10(8).
36. Brandão-Lima PN, Santos BDC, Aguilera CM, Freire ARS, Martins-Filho PRS, Pires LV. Vitamin D Food Fortification and Nutritional Status in Children: A Systematic Review of Randomized Controlled Trials. *Nutrients*. 2019;11(11).
37. Al Khalifah R, Alsheikh R, Alnasser Y, Alsheikh R, Alhelali N, Naji A, et al. The impact of vitamin D food fortification and health outcomes in children: a systematic review and meta-regression. *Syst Rev*. 2020;9(1):144.
38. Duus KS, Moos C, Frederiksen P, Andersen V, Heitmann BL. Prenatal and Early Life Exposure to the Danish Mandatory Vitamin D Fortification Policy Might Prevent Inflammatory Bowel Disease Later in Life: A Societal Experiment. *Nutrients*. 2021;13(4).



39. Buttriss JL, Lanham-New SA. Is a vitamin D fortification strategy needed? *Nutrition Bulletin*. 2020;45(2):115-22.
40. Aparna P, Muthathal S, Nongkynrih B, Gupta SK. Vitamin D deficiency in India. *J Family Med Prim Care*. 2018;7(2):324-30.
41. Darling AL. Vitamin D deficiency in western dwelling South Asian populations: an unrecognised epidemic. *Proc Nutr Soc*. 2020 Aug;79(3):259-271.
42. Uday S, Högler W. Nutritional rickets & osteomalacia: A practical approach to management. *Indian J Med Res*. 2020;152(4):356-67.
43. Holick MF. Resurrection of vitamin D deficiency and rickets. *J Clin Invest*. 2006;116(8):2062-72.
44. Sizar O, Khare S, Goyal A, Givler A. Vitamin D Deficiency. *StatPearls*. Treasure Island (FL): StatPearls Publishing Copyright © 2022, StatPearls Publishing LLC.; 2022.
45. Pellegrino L, Marangoni F, Muscogiuri G, D'Incecco P, Duval GT, Annweiler C, et al. Vitamin D Fortification of Consumption Cow's Milk: Health, Nutritional and Technological Aspects. A Multidisciplinary Lecture of the Recent Scientific Evidence. *Molecules*. 2021;26(17).
46. Stougaard M, Damm P, Frederiksen P, Jacobsen R, Heitmann BL. Extra vitamin D from fortification and the risk of preeclampsia: The D-tect Study. *PLoS One*. 2018;13(1):e0191288.
47. Grant WB, Boucher BJ. A Review of the Potential Benefits of Increasing Vitamin D Status in Mongolian Adults through Food Fortification and Vitamin D Supplementation. *Nutrients*. 2019;11(10).
48. Cranney A, Horsley T, O'Donnell S, Weiler H, Puil L, Ooi D, et al. Effectiveness and safety of vitamin D in relation to bone health. *Evid Rep Technol Assess (Full Rep)*. 2007(158):1-235.
49. Callister P, Galtry J, Didham R. The risks and benefits of sun exposure: should skin colour or ethnicity be the main variable for communicating health promotion messages in New Zealand? *Ethn Health*. 2011;16(1):57-71.
50. Adebayo FA, Itkonen ST, Öhman T, Kiely M, Cashman KD, Lamberg-Allardt C, et al. Safety of Vitamin D Food Fortification and Supplementation: Evidence from Randomized Controlled Trials and Observational Studies. *Foods*. 2021;10(12).

## Appendix 1: E-survey questionnaire

### Facilitators and Barriers in Community supplementation of Vitamin D (FABCOM-D)

---

#### Start of Block: QUESTIONS

Imperial College London Department of Primary Care & Public Health is conducting a study to investigate the knowledge and perceptions of the local community regarding vitamin D. This information will hopefully help us make changes to improve your health. The questionnaire should not take you more than **10** minutes. All your responses will be anonymous.

Q1 Are you happy to take part in this study?

Yes (1)

No (2)

Q2 Vitamin D (also known as cholecalciferol) is important for health and has been making news headlines recently. Have you heard about vitamin D from any of the following? (Please choose one or more)

- Health professionals (doctor, nurse, dietician, pharmacist) (1)
- Educational institution (school, college, university) (2)
- Media (TV, newspaper, radio, internet, magazine) (3)
- Leaflets/Posters (4)
- Personal research (8)
- General knowledge (9)
- Family/Friends (5)
- I have never heard of vitamin D before! (10)
- Other (please specify) (6) \_\_\_\_\_

Q3 Vitamin D is known to have different health benefits. Which of the following do you think are health benefits of vitamin D? (Please choose one or more)

- Improving intelligence (1)
- Preventing rickets (soft bones in children) (2)
- Improving vision (3)
- Improving hair growth (4)
- Improving skin health (5)
- Preventing osteoporosis (brittle bones) (6)
- Preventing diabetes (high blood sugars) (7)
- Supporting the immune system (10)
- I don't know (8)
- None of the above (9)

Q4 Which of the following do you think can help increase your vitamin D levels in the body? (Please choose one or more)

- Food (1)
- Supplements (2)
- Sunlight (3)
- Exercise (6)
- I don't know (7)

Q5 Which of the following do you think are the top 2 BEST ways to help increase your vitamin D levels?

- Food (1)
- Supplements (2)
- Sunlight (3)
- Exercise (6)
- I don't know (7)

Q6 Which of the following groups of people do you think are more likely to have low levels of vitamin D? (Please choose one or more)

- People who do not spend a lot of time outside during the day (2)
- People who cover up the majority of their skin when they are outside (4)
- People with dark skin (5)
- People who are vegetarian or vegan (6)
- People with some specific medical conditions (for example coeliac disease, liver and kidney problems) (9)
- Children under 4 years (12)
- People over 65 years (13)
- Pregnant women (14)
- None of the above (7)
- I don't know (8)

Q7 Which of the following do you think can affect your vitamin D levels? (Please choose one or more)

- Not spending time outside during the day (4)
- Smoking (7)
- Sunscreen use (8)
- High fat diet (9)
- Not getting enough sunlight (for example because of cloudy weather, air pollution, higher latitudes or winter season) (15)
- Vegetarian or Vegan diet (16)
- None of these (10)
- I don't know (11)

Q8 Current NHS recommendations include taking daily supplements of vitamin D. Do you know what is the recommended daily intake of vitamin D in the UK?

- 10 micrograms (400 IU) (2)
- 25 micrograms (1000 IU) (3)
- 50 micrograms (2000 IU) (4)
- 100 micrograms (4000 IU) (5)
- I don't know (7)
- Other (please state) (6) \_\_\_\_\_

Q9 Do you usually take vitamin D supplements?

- Yes recently (in the last 12 months) (1)
- Yes, for a number of years (4)
- No (2)

Q10 What made you start taking vitamin D supplements? (Please choose one or more)

- A healthcare professional (doctor, nurse, pharmacist) advised me to start taking vitamin D supplements (1)
- Government/ NHS recommendations (9)
- My choice - vitamin D is good for my health (2)
- I don't think I get enough vitamin D from food (3)
- I don't think I get enough sun exposure (4)
- They are part of a multivitamin supplement I take (8)
- A friend or family advised me to take vitamin D supplements (5)
- Other (please state) (6) \_\_\_\_\_

*Display This Question:*

*If Do you usually take vitamin D supplements? = Yes recently (in the last 12 months)  
And Do you usually take vitamin D supplements? = Yes, for a number of years*

Q11 How do you take your vitamin D supplements?

- I buy them over the counter (1)
- I get them prescribed by my doctor (2)

*Display This Question:*

*If Do you usually take vitamin D supplements? = Yes recently (in the last 12 months)  
And Do you usually take vitamin D supplements? = Yes, for a number of years*

Q12 What strength of vitamin D supplements do you take?

- 10 micrograms (400 IU) (1)
- 25 micrograms (1000 IU) (2)
- 50 micrograms (2000 IU) (3)
- 100 micrograms (4000 IU) (4)
- Other (please state) (5) \_\_\_\_\_
- I don't know (6)
- 

*Display This Question:*

*If Do you usually take vitamin D supplements? = Yes recently (in the last 12 months)*

*And Do you usually take vitamin D supplements? = Yes, for a number of years*

Q13 On average how often do you take your vitamin D supplement?

- Daily (3)
- Weekly (6)
- Monthly (4)
- I do not take it on a regular basis (please state how often) (5)  
\_\_\_\_\_

*Display This Question:*

*If Do you usually take vitamin D supplements? = Yes recently (in the last 12 months)*

*And Do you usually take vitamin D supplements? = Yes, for a number of years*



Q14 In what form do you take vitamin D? (Please choose one or more)

- Vitamin D capsule (1)
- Vitamin D oil (2)
- Vitamin D drops or spray (3)
- Combined vitamin D & calcium tablet (4)
- Mutlivatamin (5)
- Cod liver oil (6)
- Other (please state) (7) \_\_\_\_\_

Q15 Do you take any other vitamins or supplements?

- Yes (Please state which ones) (1) \_\_\_\_\_
- No (2)

Q16 To your knowledge, have you ever had a blood test to check your vitamin D levels?

- Yes (1)
- No (2)
- I don't know (3)

Q17 In the UK most people are asked to pay for their own vitamin D supplements. To what extent do you agree with the following statements?

|                                                                                                                                                                            | Strongly agree (1)    | Agree (2)             | Neither Agree or Disagree (3) | Disagree (4)          | Strongly Disagree (5) |
|----------------------------------------------------------------------------------------------------------------------------------------------------------------------------|-----------------------|-----------------------|-------------------------------|-----------------------|-----------------------|
| People at risk of vitamin D deficiency (for example older patients, pregnant women & people with dark skin tones) should have their vitamin D levels checked regularly (7) | <input type="radio"/> | <input type="radio"/> | <input type="radio"/>         | <input type="radio"/> | <input type="radio"/> |
| People at risk of vitamin D deficiency should get free vitamin D supplements (2)                                                                                           | <input type="radio"/> | <input type="radio"/> | <input type="radio"/>         | <input type="radio"/> | <input type="radio"/> |
| Doctors should check vitamin D levels before recommending supplements (5)                                                                                                  | <input type="radio"/> | <input type="radio"/> | <input type="radio"/>         | <input type="radio"/> | <input type="radio"/> |
| Testing vitamin D levels should be part of the NHS health check (The NHS health check tests for early signs of heart and brain disease in adults over 40 years) (6)        | <input type="radio"/> | <input type="radio"/> | <input type="radio"/>         | <input type="radio"/> | <input type="radio"/> |
| People should pay for their vitamin D supplements regardless (1)                                                                                                           | <input type="radio"/> | <input type="radio"/> | <input type="radio"/>         | <input type="radio"/> | <input type="radio"/> |

Q18 People take vitamin D either regularly or for a specific time period (for example during the winter). How much are you prepared to pay for a MONTH'S supply of vitamin D supplements?

- Less than £5 (1)
- Between £5-10 (2)
- More than £10 (5)
- I would not be willing to pay to take vitamin D supplements (6)

Q19 If you could obtain them, would you prefer to have foods that are fortified with vitamin D (for example orange juice or milk with added vitamin D) instead of taking separate supplements?

- Yes (1)
- No (2)

*Display This Question:*

*If you could obtain them, would you prefer to have foods that are fortified with vitamin D (for e... = No*

Q20 Why would you not buy foods with added vitamin D? (please choose one or more)

- I don't think they would be safe (1)
- I don't like the idea of eating processed or fortified food (6)
- I don't think I need them (2)
- I don't think I would like their taste (3)
- I think they would be too expensive (4)
- There are not any available in my local supermarket (7)
- Other (please specify) (5) \_\_\_\_\_

Q21 How important are the following factors for you when you decide to take vitamin D supplements?

|                                                                                              | Very Important (1)    | Important (2)         | Neutral (3)           | Unimportant (4)       | Very unimportant (5)  |
|----------------------------------------------------------------------------------------------|-----------------------|-----------------------|-----------------------|-----------------------|-----------------------|
| Knowledge about the health benefits of vitamin D & prevention** (5)                          | <input type="radio"/> | <input type="radio"/> | <input type="radio"/> | <input type="radio"/> | <input type="radio"/> |
| Advice from health professionals (doctors or nurses) & from the NHS (3)                      | <input type="radio"/> | <input type="radio"/> | <input type="radio"/> | <input type="radio"/> | <input type="radio"/> |
| Low vitamin D levels on blood tests (2)                                                      | <input type="radio"/> | <input type="radio"/> | <input type="radio"/> | <input type="radio"/> | <input type="radio"/> |
| Experiencing symptoms of low vitamin D levels (for example bone pain or muscle weakness) (7) | <input type="radio"/> | <input type="radio"/> | <input type="radio"/> | <input type="radio"/> | <input type="radio"/> |
| Reduced exposure to sunlight (15)                                                            | <input type="radio"/> | <input type="radio"/> | <input type="radio"/> | <input type="radio"/> | <input type="radio"/> |
| Easy access to the supplement (for example at a local supermarket or pharmacy) (12)          | <input type="radio"/> | <input type="radio"/> | <input type="radio"/> | <input type="radio"/> | <input type="radio"/> |
| Access to the appropriate dosage over the counter (without prescription) (14)                | <input type="radio"/> | <input type="radio"/> | <input type="radio"/> | <input type="radio"/> | <input type="radio"/> |
| Cost of supplementation (4)                                                                  | <input type="radio"/> | <input type="radio"/> | <input type="radio"/> | <input type="radio"/> | <input type="radio"/> |
| If the supplement contains other vitamins, nutrients & minerals (13)                         | <input type="radio"/> | <input type="radio"/> | <input type="radio"/> | <input type="radio"/> | <input type="radio"/> |
| How often I need to take the supplement (9)                                                  | <input type="radio"/> | <input type="radio"/> | <input type="radio"/> | <input type="radio"/> | <input type="radio"/> |
| Taste, flavour & smell of supplement (8)                                                     | <input type="radio"/> | <input type="radio"/> | <input type="radio"/> | <input type="radio"/> | <input type="radio"/> |
| If the supplement is available in the liquid form (11)                                       | <input type="radio"/> | <input type="radio"/> | <input type="radio"/> | <input type="radio"/> | <input type="radio"/> |
| How easy it is to chew or swallow the supplement (10)                                        | <input type="radio"/> | <input type="radio"/> | <input type="radio"/> | <input type="radio"/> | <input type="radio"/> |

Q22 Which TWO of the following do you find most useful sources for health related information? (Please choose TWO options)

- NHS website (10)
- Health professionals (doctor, nurse, pharmacists) (2)
- Educational institutions (school, college, university) (3)
- Internet/Media (TV, newspaper, radio, internet, magazine) (4)
- Family & friends (8)
- Celebrities & influencers (9)
- Online platforms (for example mums net or Facebook groups) (7)

Q23 10-15 minutes of direct sunlight exposure daily is considered reasonable for promoting healthy levels of vitamin D production. How many hours a day do you spend on average outside in the sunlight in the spring & summer months?

- Less than 1 hour (6)
- Between 1 - 3 hours (10)
- Between 3 - 5 hours (11)
- More than 5 hours (12)

Q24 On average how much do you cover up during the spring/summer months?

- Minimal coverage (exposure of shoulders and above the knee) (1)
- Moderate coverage (exposure of forearms, below knee and face) (2)
- Maximum coverage (exposure only hands and face) (3)
- Total coverage (no skin exposure) (4)

Q25 Which sex were you assigned at birth?

- Male (1)
- Female (2)
- Other (please specify) (3) \_\_\_\_\_

*Display This Question:*

*If Which sex were you assigned at birth? = Female*

Q26 Are you any of the following?

- Menopausal (1)
- Breast-feeding (2)
- Pregnant (3)
- None of the above (4)

Q27 How old are you (years)?

\_\_\_\_\_

Q28 What is your ethnicity?

- White (1)
- Mixed/Multiple ethnic groups (7)
- Asian/Asian British (2)
- Black/African/Caribbean/Black British (5)
- Other ethnic group (please state) (6) \_\_\_\_\_

Q29 Do you have any dietary restrictions or follow a particular diet?

- Vegetarian (1)
- Vegan (2)
- Lactose intolerant (3)
- Pescatarian (4)
- Kosher (5)
- Halal (6)
- No, I don't follow a particular diet (7)
- Other (please state) (8) \_\_\_\_\_

Q30 Do you have any of the following medical conditions?

- Liver problems (1)
- Kidney problems (2)
- Coeliac disease/Crohn's disease/ulcerative colitis (3)
- No I don't have any of these (4)

Q31 From the skin types (colours) in this picture, which skin type do you think that best describes your skin colour?

- Type 1 LIGHT, PALE WHITE - Always burns, Never tans (1)
- Type 2 WHITE, FAIR (Usually Burns, Tans with difficulty) (2)
- Type 3 MEDIUM, WHITE TO OLIVE (Sometimes mild burns, gradually tans to Olive) (3)
- Type 4 OLIVE, MODERATE BROWN (Rarely burns, Tans with ease to a Moderate Brown) (4)
- Type 5 BROWN, DARK BROWN (Very rarely burns, Tans very easily) (5)
- Type 6 BLACK, VERY DARK BROWN TO BLACK (Never burns, Tans very easily, Deeply pigmented) (6)

Q32 What is your highest level of education?

- Did not finish high school (1)
- High school (2)
- University degree or above (3)
- Other (please specify) (6) \_\_\_\_\_

Q33 Which borough or town in the UK do you live in?

\_\_\_\_\_



Q34 What is your employment status?

- Employed full time (1)
- Employed part time (2)
- Unemployed (3)
- Unable to work (8)
- Furloughed (4)
- Retired (5)
- Student (6)

Q35 What is your height (in centimetres) and your weight (in kilograms)?

- Height: (4) \_\_\_\_\_
- Weight: (7) \_\_\_\_\_
- Prefer not to say (5)

Thank you for taking the time to answer the questions in this survey.  
Researchers from Imperial College London are looking to interview up to 30 participants (via telephone, Skype, or Microsoft Teams) to learn more about specific themes. Interviews will last 30-45 minutes. Please provide

your name & contact details below if this interests you.

We are also happy to answer any questions on the study and can fix a suitable time and date for a chat.

**If you are not able to help at this time, that is also fine. Please click next to register your responses.**

Name: (1) \_\_\_\_\_

E-mail: (2) \_\_\_\_\_

Mobile phone number: (4) \_\_\_\_\_

End of Block: QUESTIONS

---
